# Supplementary material for: Active Lactobacillus rhamnosus LA68 or Lactobacillus plantarum WCFS1 administration positively influences liver fatty acid composition in mice on a HFD regime
Source: Royal Society of Chemistry journal article supplement (doi:10.1039/c5fo01432h), 2016-01-01
Supplement: c5fo01432h1.pdf [file c5fo01432h1.pdf]

**Table S1. Fatty acid composition (%) in brain of C57/BL mice on HFD regime after 8 week wash out period**

| FAMEs      | HFD                          | HFD WCFS1                  | HFD LA68                    |
|------------|------------------------------|----------------------------|-----------------------------|
| 16:0       | 17.131 ± 1.181               | 17.433 ± 0.996             | 17.557 ± 1.157 <sup>†</sup> |
| 18:0       | 15.305 ± 0.950               | 15.480 ± 0.971             | 15.957 ± 0.663              |
| 20:0       | 0.327 ± 0.025 <sup>†</sup>   | 0.345 ± 0.036              | 0.347 ± 0.033 <sup>†</sup>  |
| 22:0       | 0.608 ± 0.054 <sup>†</sup>   | 0.650 ± 0.065 <sup>†</sup> | 0.652 ± 0.044 <sup>†</sup>  |
| 24:0       | 0.637 ± 0.089                | 0.796 ± 0.112              | 0.767 ± 0.139 <sup>†</sup>  |
| 16:1n-7    | 0.543 ± 0.067 <sup>†</sup>   | 0.510 ± 0.030              | 0.557 ± 0.022 <sup>†</sup>  |
| 18:1n-9    | 16.288 ± 0.937 <sup>†</sup>  | 15.673 ± 0.823             | 16.221 ± 0.933 <sup>†</sup> |
| 18:1n-7    | 3.454 ± 0.173 <sup>†</sup>   | 3.384 ± 0.192              | 3.468 ± 0.206 <sup>†</sup>  |
| 20:1n-9    | 2.425 ± 0.146 <sup>†</sup>   | 2.282 ± 0.147              | 2.319 ± 0.054 <sup>†</sup>  |
| 24:1n-9    | 2.276 ± 0.219 <sup>†</sup>   | 2.546 ± 0.285 <sup>†</sup> | 2.574 ± 0.232 <sup>†</sup>  |
| 18:2n-6    | 0.349 ± 0.021                | 0.342 ± 0.064              | 0.356 ± 0.024               |
| 20:2n-6    | 0.206 ± 0.036                | 0.214 ± 0.045              | 0.200 ± 0.031               |
| 20:3n-6    | 0.359 ± 0.010                | 0.351 ± 0.020              | 0.356 ± 0.016               |
| 20:4n-6    | 9.427 ± 0.130 <sup>a</sup>   | 8.876 ± 0.322 <sup>b</sup> | 9.382 ± 0.129 <sup>a</sup>  |
| 20:5n-3    | 0.360 ± 0.080 <sup>†</sup>   | 0.449 ± 0.129              | 0.394 ± 0.104               |
| 22:6n-3    | 2.815 ± 0.118 <sup>†</sup>   | 2.616 ± 1.222 <sup>†</sup> | 2.617 ± 0.016 <sup>†</sup>  |
| Σ SFA      | 34.012 ± 2.219               | 34.708 ± 2.058             | 35.280 ± 1.772 <sup>†</sup> |
| Σ MUFA     | 24.992 ± 1.472 <sup>†</sup>  | 24.398 ± 1.419             | 25.138 ± 1.356 <sup>†</sup> |
| Σ PUFA     | 13.518 ± 0.287 <sup>†</sup>  | 12.848 ± 0.543             | 13.305 ± 0.151 <sup>†</sup> |
| PUFA n-3   | 3.176 ± 0.195 <sup>†</sup>   | 3.066 ± 0.192 <sup>†</sup> | 3.015 ± 0.117 <sup>†</sup>  |
| PUFA n-6   | 10.342 ± 0.137 <sup>a†</sup> | 9.782 ± 0.374 <sup>b</sup> | 10.290 ± 0.129 <sup>a</sup> |
| HUFA n6/n3 | 3.266 ± 0.184 <sup>†</sup>   | 3.194 ± 0.118 <sup>†</sup> | 3.418 ± 0.145 <sup>†</sup>  |

Values are presented as mean ± SD (g/100 g fatty acid methyl esters); n=6 mice per group. Values in the same row with different superscript letters are significantly different. P < 0.05 (ANOVA followed by post hoc Tukey's multiple comparison tests). **Values in the same row and column in Table S1 and Table 3 (in Manuscript) with symbol † are significant different P < 0.05 (two sample T-test).** FAME, fatty acid methyl ester; SFA, Saturated Fatty acid; MUFA, monounsaturated fatty acid; PUFA, polyunsaturated fatty acid.

**Table 2. Fatty acid composition (%) in heart of C57/BL mice on HFD regime after 8 week wash out period**

| <b>FAMES</b> | <b>HFD</b>                  | <b>HFD WCFS1</b>            | <b>HFD LA68</b>             |
|--------------|-----------------------------|-----------------------------|-----------------------------|
| 16:0         | 18.673 ± 1.708 <sup>†</sup> | 18.929 ± 2.566 <sup>†</sup> | 15.820 ± 3.645              |
| 18:0         | 22.943 ± 2.769 <sup>†</sup> | 20.535 ± 2.065              | 17.099 ± 4.423              |
| 20:0         | 0.437 ± 0.093 <sup>†</sup>  | 0.348 ± 0.072               | 0.339 ± 0.088               |
| <b>22:0</b>  | 0.631 ± 0.064 <sup>a†</sup> | 0.418 ± 0.141 <sup>b</sup>  | 0.552 ± 0.078 <sup>ab</sup> |
| 16:1n-7      | 1.558 ± 0.413               | 2.366 ± 0.948               | 1.811 ± 0.802               |
| 18:1n-9      | 18.207 ± 1.464              | 22.612 ± 3.713 <sup>†</sup> | 18.916 ± 4.738              |
| 18:1n-7      | 2.294 ± 0.221 <sup>†</sup>  | 2.435 ± 0.206 <sup>†</sup>  | 2.846 ± 1.111               |
| 20:1n-9      | 0.422 ± 0.095               | 0.455 ± 0.049               | 0.375 ± 0.130               |
| 18:2n-6      | 9.568 ± 1.054               | 8.629 ± 1.189               | 7.913 ± 2.257               |
| 20:2n-6      | 0.458 ± 0.089               | 0.657 ± 0.214               | 0.461 ± 0.143               |
| 20:3n-6      | 1.508 ± 0.251               | 1.512 ± 0.130               | 1.470 ± 0.146 <sup>†</sup>  |
| 20:4n-6      | 7.342 ± 1.956               | 6.452 ± 1.231               | 7.837 ± 1.919 <sup>†</sup>  |
| 20:5n-3      | 1.281 ± 0.362               | 2.665 ± 1.193               | 1.533 ± 0.731               |
| 22:5n-3      | 1.161 ± 0.401               | 0.931 ± 0.263               | 1.160 ± 0.430 <sup>†</sup>  |
| 22:6n-3      | 6.319 ± 3.249               | 4.261 ± 1.432               | 7.658 ± 3.217 <sup>†</sup>  |
| Σ SFA        | 42.682 ± 4.541 <sup>†</sup> | 40.230 ± 4.299              | 33.807 ± 8.156              |
| Σ MUFA       | 22.480 ± 1.888              | 27.868 ± 4.178 <sup>†</sup> | 23.950 ± 4.945              |
| Σ PUFA       | 27.635 ± 6.136              | 25.105 ± 4.043              | 28.033 ± 6.306 <sup>†</sup> |
| PUFA n-3     | 8.878 ± 3.371 <sup>†</sup>  | 7.855 ± 2.342               | 10.350 ± 3.058 <sup>†</sup> |
| PUFA n-6     | 9.310 ± 2.113               | 8.620 ± 1.296               | 9.770 ± 1.900 <sup>†</sup>  |
| PUFA n6/n3   | 1.109 ± 0.185 <sup>†</sup>  | 1.142 ± 0.217               | 0.967 ± 0.141               |

Values are presented as mean ± SD (g/100 g fatty acid methyl esters); n=6 mice per group. Values in the same row with different superscript letters are significantly different. P < 0.05 (ANOVA followed by post hoc Tukey's multiple comparison tests). **Values in the same row and column in Table S2 and Table 4 (in Manuscript) with symbol † are significant different P< 0.05 (two sample T-test).** FAME, fatty acid methyl ester; SFA, Saturated Fatty acid; MUFA, monounsaturated fatty acid; PUFA, polyunsaturated fatty acid.
